# Supplementary material
Source: PubMed Central journal article supplement (PMC3867650)
Supplement: 97320630009973S1.pdf [file 97320630009973S1.pdf]

## Supplementary material:

**Table 1:** Docking scores of compounds against GGTase1 with scores less than -6.5.

| Compound     | Dock score |
|--------------|------------|
| Camptothecin | -8.2       |
| 297          | -7.5       |
| 298          | -7.5       |
| Curcumin     | -7.3       |
| CHEMBL525185 | -7.2       |
| Catechin     | -6.9       |
| 287          | -6.5       |
